# Supplementary material
Source: PubMed Central journal article supplement (PMC4854684)
Supplement: supp_pp.15.01854_PP2015-01854R1_Supplemental_Material.pdf [file supp_pp.15.01854_PP2015-01854R1_Supplemental_Material.pdf]

S1

## Frass proteins after isoelectric fractionation

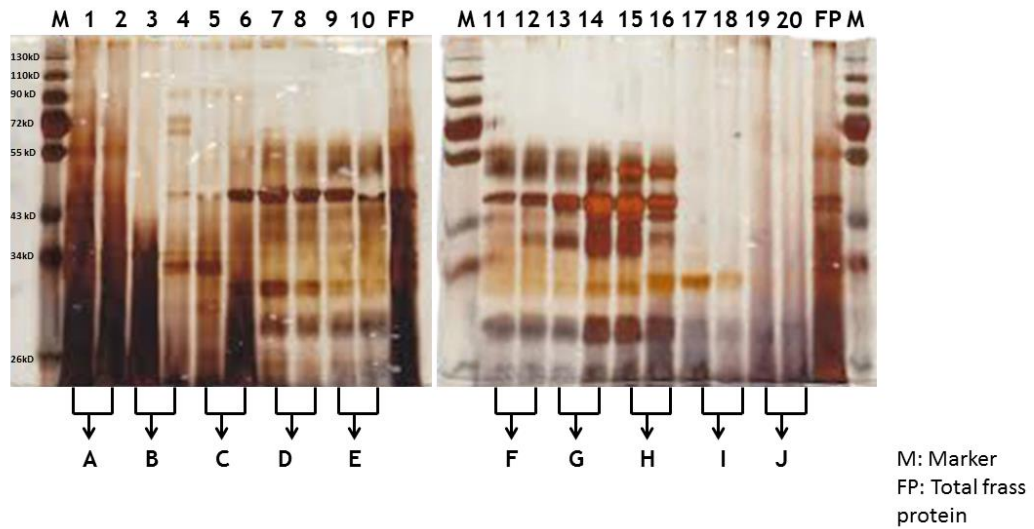

Fig S1: Denaturing polyacrylamide gel showing proteins in fractions A-J after isoelectric focusing of frass proteins.

S2

## Denaturing polyacrylamide gel showing chitin binding proteins in FAW frass

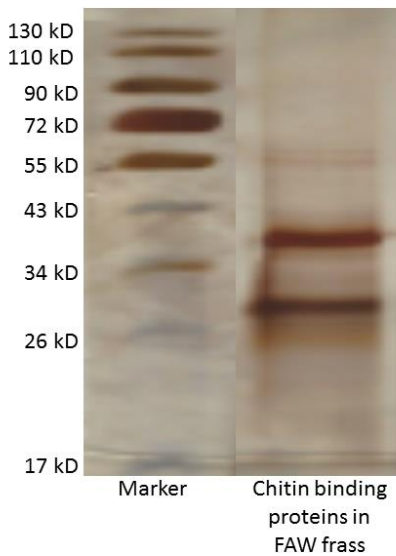

Fig S2: Denaturing polyacrylamide gel showing chitin-binding proteins in FAW frass

S3a

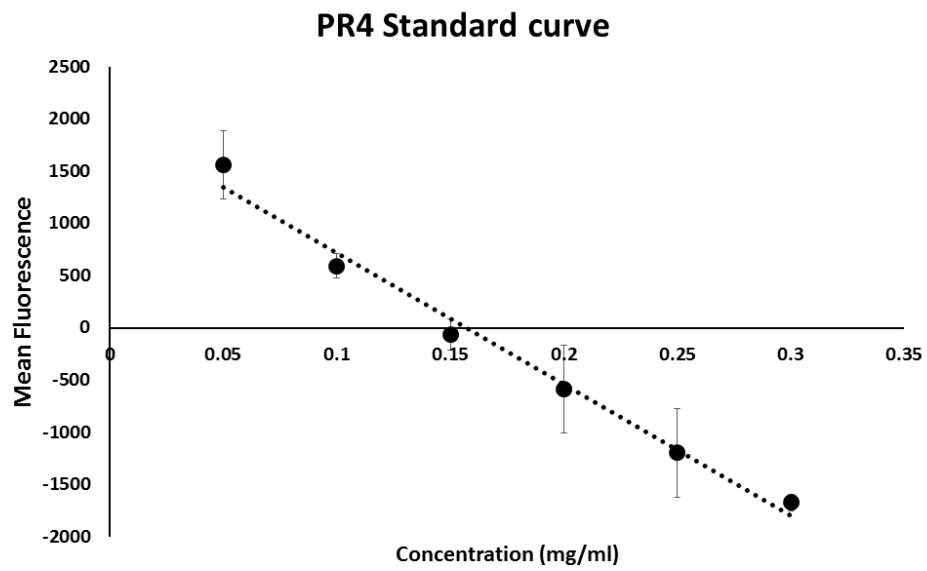

S3b

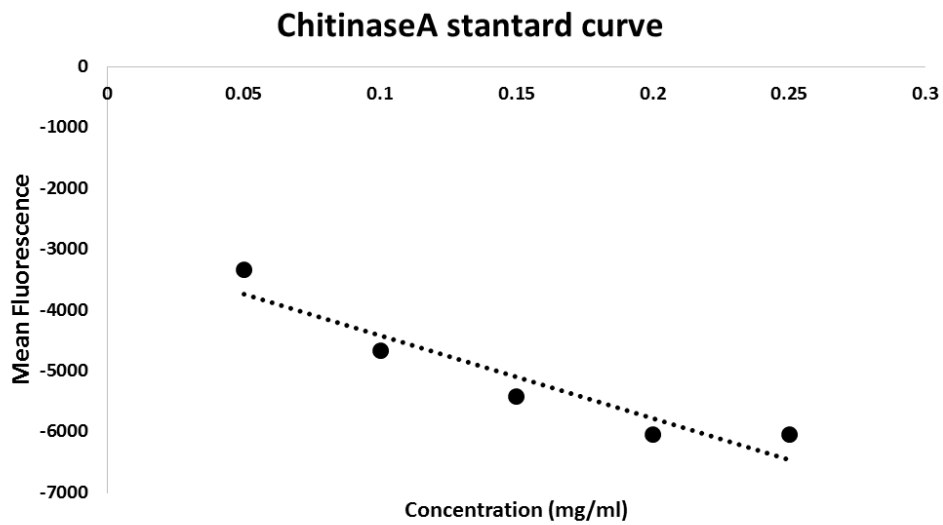

Fig S3: Standard curve showing Pr4 (a) and Endochitinase A (b) chitinase activity.

S4a

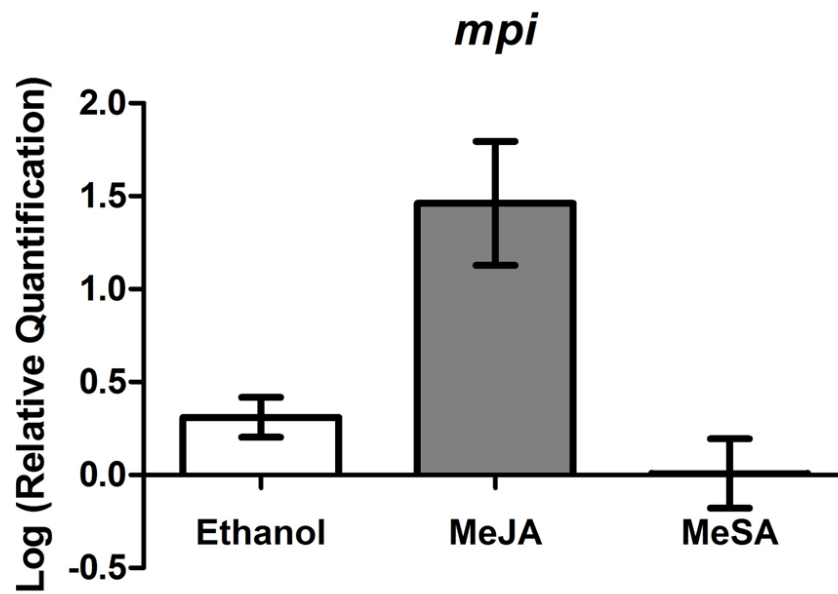

S4b

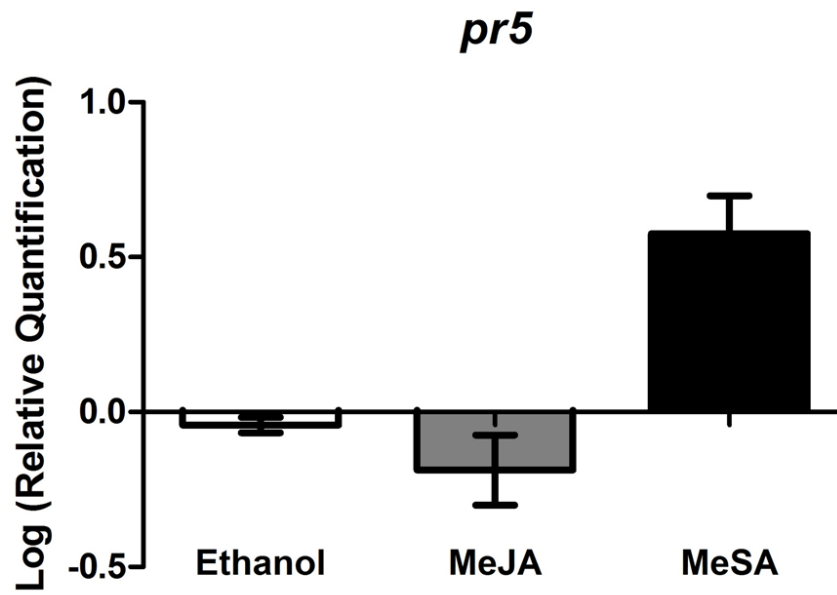

Fig S4: Expression of maize herbivore defense gene *mpi* (a) and *pr5* (b) in response to 10mM Methyl jasmonate (MeJA) or 10mM methyl salicylate (MeSA) spray.

S5

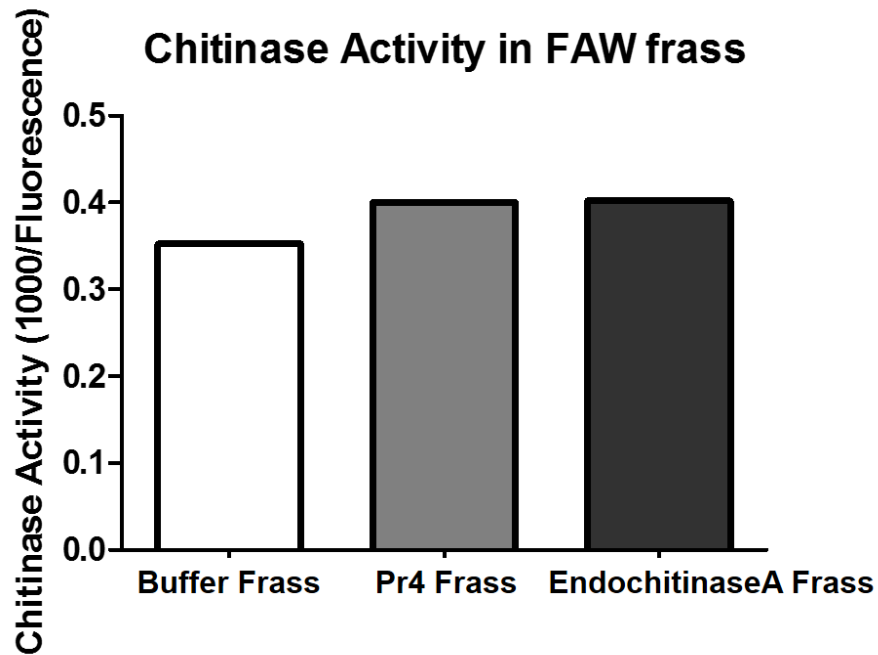

Figure S5: Chitinase activity in FAW frass fed on diet infused with recombinant Pr4, Endochitinase A or buffer.

Table S1: List of primers.

| Name                             | Forward               | Reverse                 | NCBI accession |
|----------------------------------|-----------------------|-------------------------|----------------|
| Pr4 cloning                      | CACCCAGAACTGCGGGTGCGC | GCAGGTGAGGTTGTTGCCCGGGT | NP_001150754.1 |
| EndochitinaseA cloning           | CACCCAGAACTGCGGCTGCCA | GCAAGTGAGGTTGGGCCCTGGG  | NP_001158904.1 |
| Pr4 quantitative PCR             | GCCAACCACGAGACCATAAAG | CACGGCCACTGCGTGTT       | NP_001150754.1 |
| Endochitinase A quantitative PCR | CAAGACGGCGCTCTGGTT    | AAGCCCTGCGGCATCA        | NP_001158904.1 |
